# Supplementary material for: Network Pharmacology- and Molecular Dynamics Simulation-Based Bioprospection of Aspalathus linearis for Type-2 Diabetes Care
Source: MDPI journal article supplement (doi:10.3390/metabo12111013), 2022-10-24
Supplement: s1 [file s1]

## Supplementary data

**Table S1.** Complete list of rooibos compounds investigated and details of Lipinski's violation

| S/N | Compounds                               | Passed Lipinski's/<br>no of violations | The 13<br>compounds |
|-----|-----------------------------------------|----------------------------------------|---------------------|
| 1   | (+)-catechin                            | Yes                                    | 1                   |
| 2   | Apigenin                                | Yes                                    | 2                   |
| 3   | Aspalathin                              | No - 2                                 |                     |
| 4   | Carlinoside                             | No - 3                                 |                     |
| 5   | Chlorogenic acid                        | Yes - 1                                | 3                   |
| 6   | Chrysoeriol                             | Yes                                    | 4                   |
| 7   | Dihydrochalcone                         | Yes                                    | 5                   |
| 8   | Eriodictyol 5,3'-di-O-glucoside         | No - 3                                 |                     |
| 9   | Esculin                                 | Yes                                    | 6                   |
| 10  | Ferulic                                 | Yes                                    | 7                   |
| 11  | Hyperoside                              | No - 2                                 |                     |
| 12  | Isocarlinoside                          | No - 3                                 |                     |
| 13  | Isoorientin                             | No - 2                                 |                     |
| 14  | Isoquercitrin                           | No - 2                                 |                     |
| 15  | Isovitexin                              | Yes                                    | 8                   |
| 16  | Kaempferol                              | Yes                                    | 9                   |
| 17  | Luteolin                                | No - 2                                 |                     |
| 18  | Luteolin-7-O-glucoside                  | No - 2                                 |                     |
| 19  | Neocarlinoside                          | No - 3                                 |                     |
| 20  | Nothofagin                              | Yes - 1                                | 10                  |
| 21  | Orientin                                | No - 2 violations                      |                     |
| 22  | Patuletin 7-glucoside                   | No - 2 violations                      |                     |
| 23  | <i>p</i> -coumaric acid                 | Yes                                    | 11                  |
| 24  | Procyanidin B3                          | No - 3                                 |                     |
| 25  | Quercetin                               | No                                     |                     |
| 26  | Quercetin-3- <i>O</i> -arabinoglucoside | No - 3                                 |                     |
| 27  | Quercetin-3- <i>O</i> -galactoside      | No - 2                                 |                     |
| 28  | Quercetin-3- <i>O</i> -glucoside        | No - 2                                 |                     |
| 29  | Quercetin-3- <i>O</i> -robinobioside    | No - 3                                 |                     |
| 30  | Quercitrin                              | No - 2                                 |                     |
| 31  | Rutin                                   | No - 3                                 |                     |
| 32  | Safflomin                               | No - 3                                 |                     |
| 33  | Scoparin                                | No - 2                                 |                     |
| 34  | Sinapic acid                            | Yes                                    | 12                  |
| 35  | Vicenin-2                               | No                                     |                     |
| 36  | Vitexin                                 | Yes - 1                                | 13                  |

**Table S2.** 2D interactions of key targets and their associated key rooibos compounds in the HIF-1 pathway.

| Compounds | 2D interactions                                                                                                                                                                     |
|-----------|-------------------------------------------------------------------------------------------------------------------------------------------------------------------------------------|
| EGFR      |                                                                                                                                                                                     |
| Apigenin  | 60 ns                                                                                                                                                                               |
|           | <p>Interactions</p> <ul style="list-style-type: none"><li>van der Waals</li><li>Conventional Hydrogen Bond</li><li>Unfavorable Acceptor-Acceptor</li><li>Pi-Alkyl</li></ul>         |
|           | 30 ns                                                                                                                                                                               |
|           | <p>Interactions</p> <ul style="list-style-type: none"><li>van der Waals</li><li>Conventional Hydrogen Bond</li><li>Carbon Hydrogen Bond</li><li>Pi-Sigma</li><li>Pi-Alkyl</li></ul> |
|           | 0 ns                                                                                                                                                                                |
|           | <p>Interactions</p> <ul style="list-style-type: none"><li>van der Waals</li><li>Conventional Hydrogen Bond</li><li>Pi-Alkyl</li></ul>                                               |

60 ns

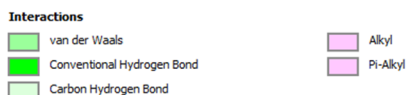

30 ns

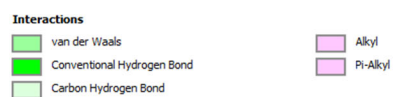

---

0 ns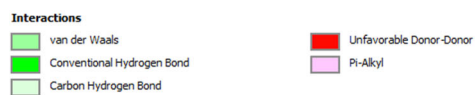

Chrysoeriol 60 ns

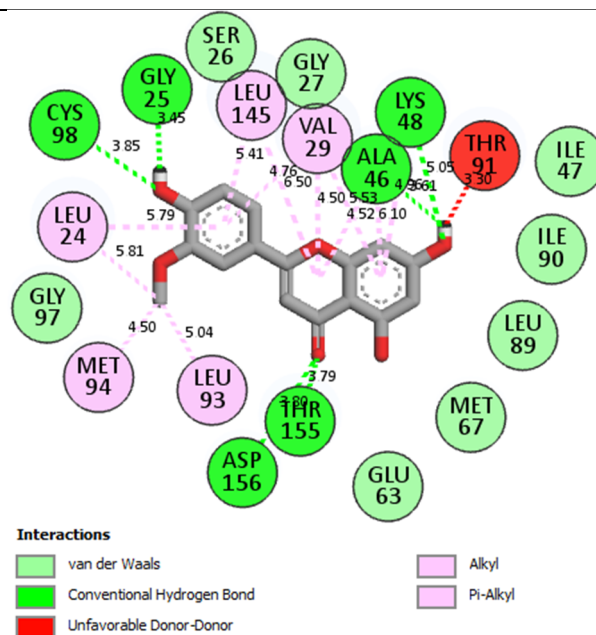

30 ns

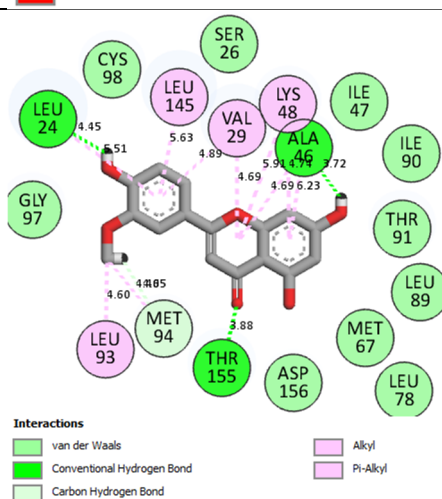

0 ns

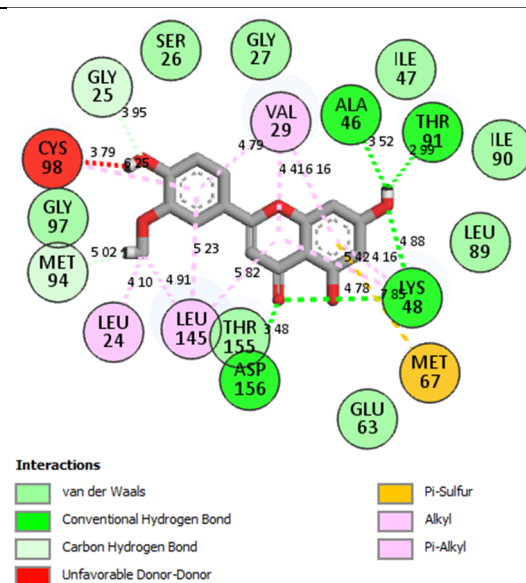



Ferulic

60 ns

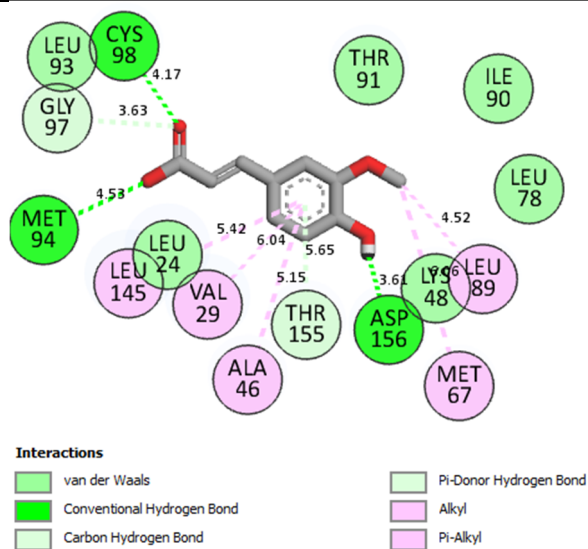

30 ns

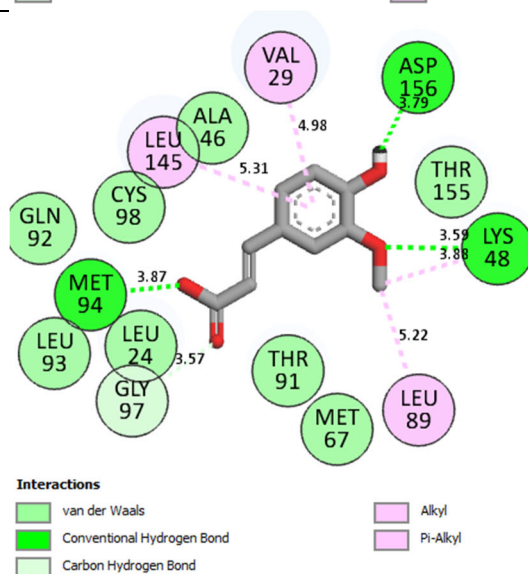

0 ns

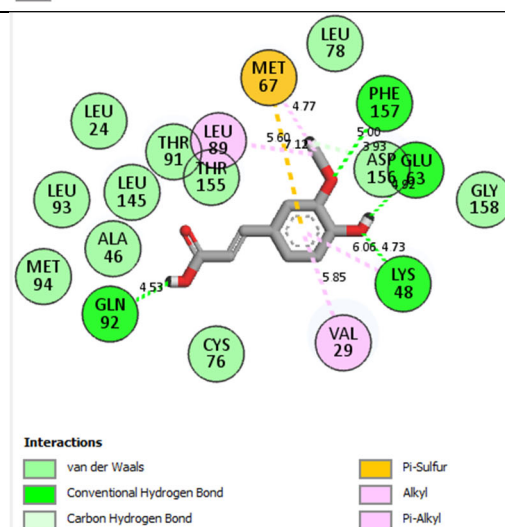

Isovitexin 60 ns

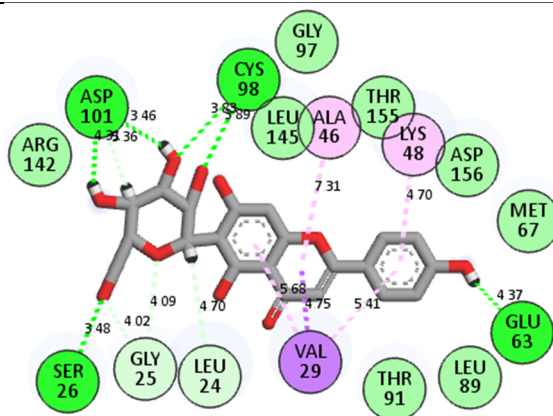

Interactions

- van der Waals
- Conventional Hydrogen Bond
- Carbon Hydrogen Bond
- Pi-Sigma
- Pi-Alkyl

30 ns

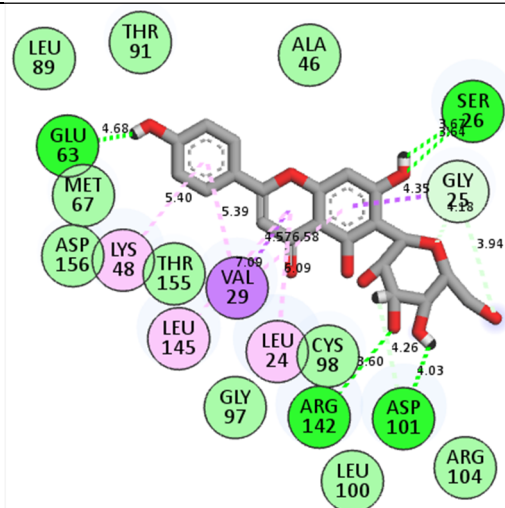

Interactions

- van der Waals
- Conventional Hydrogen Bond
- Carbon Hydrogen Bond
- Pi-Sigma
- Pi-Alkyl

0 ns

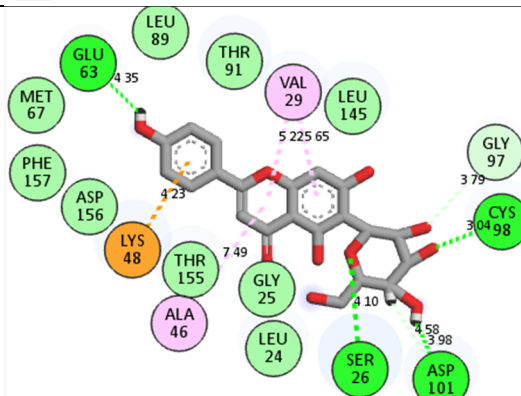

Interactions

- van der Waals
- Conventional Hydrogen Bond
- Carbon Hydrogen Bond
- Pi-Cation
- Pi-Alkyl

Kaempferol 60 ns

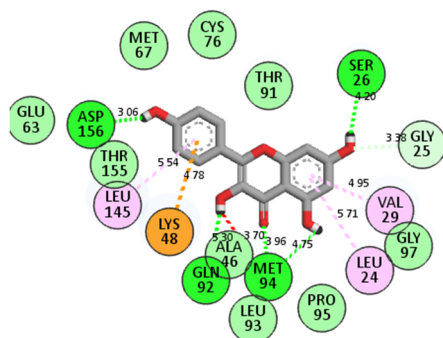

**Interactions**

- van der Waals
- Conventional Hydrogen Bond
- Carbon Hydrogen Bond
- Unfavorable Donor-Donor
- Pi-Cation
- Pi-Alkyl

30 ns

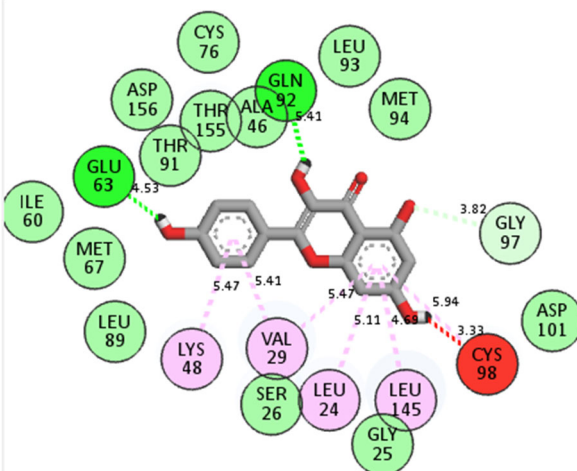

**Interactions**

- van der Waals
- Conventional Hydrogen Bond
- Carbon Hydrogen Bond
- Unfavorable Donor-Donor
- Pi-Alkyl

0 ns

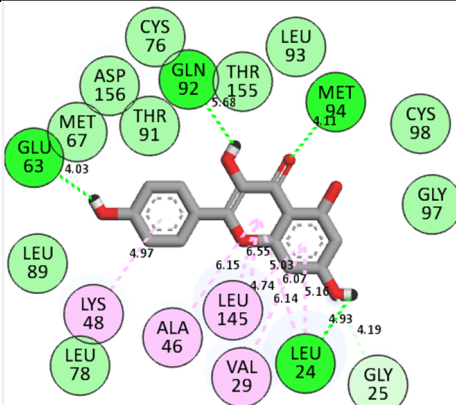

**Interactions**

- van der Waals
- Conventional Hydrogen Bond
- Carbon Hydrogen Bond
- Pi-Alkyl

*P*-coumaric acid 60 ns

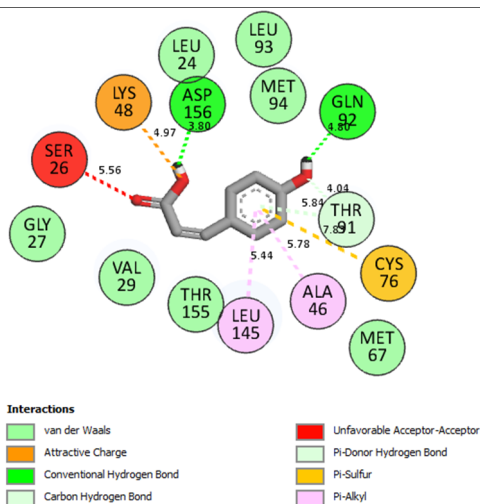

30 ns

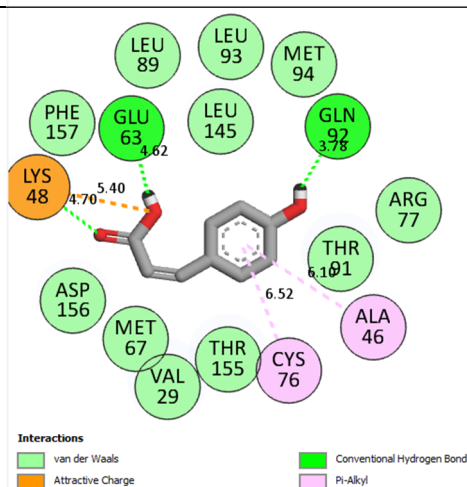

0 ns

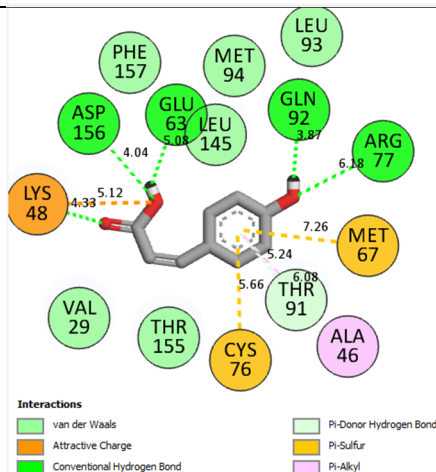

Sinapic acid 60 ns

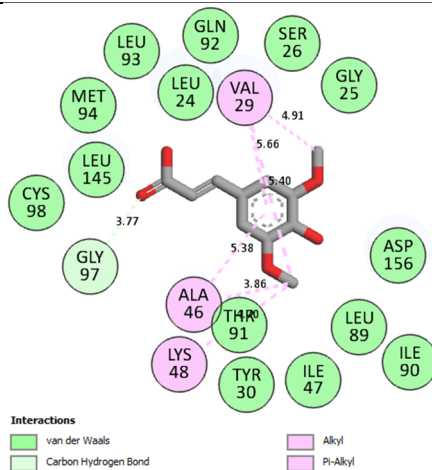

30 ns

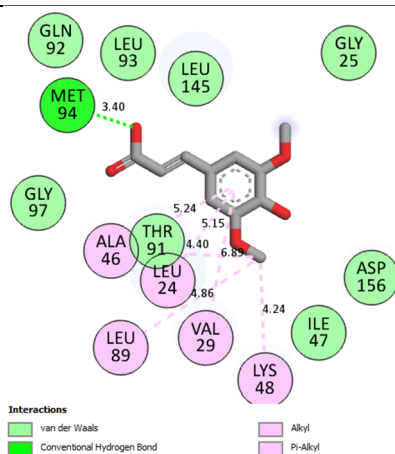

0 ns

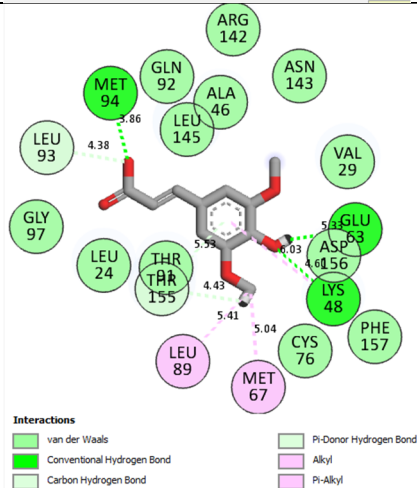

IGF1R

# Chlorogenic acid

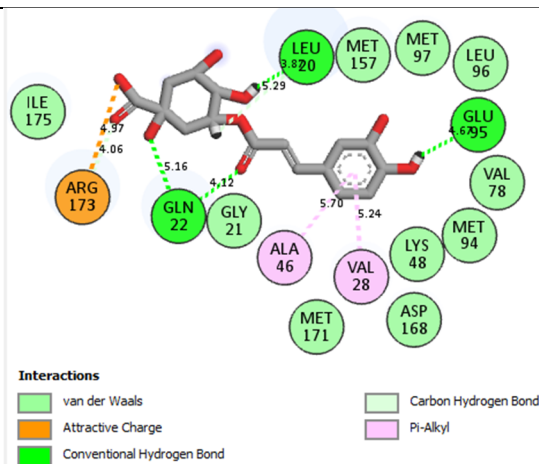

30 ns

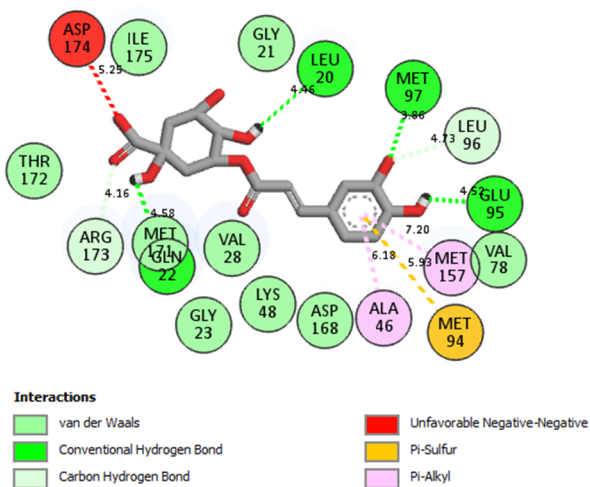

0 ns

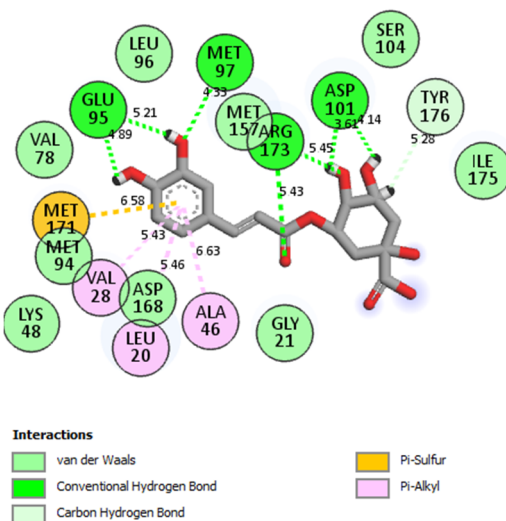

Chrysoeriol 60 ns

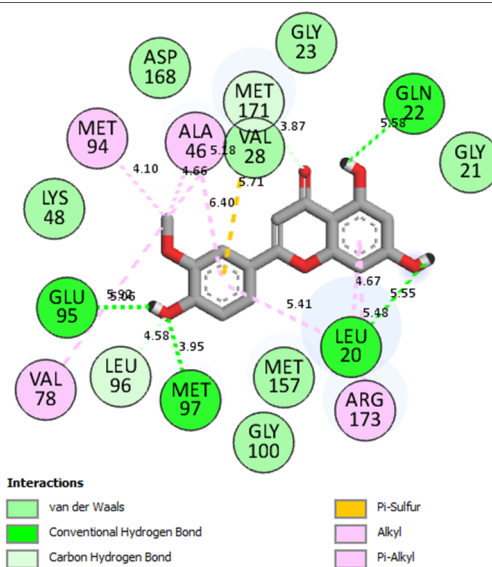

30 ns

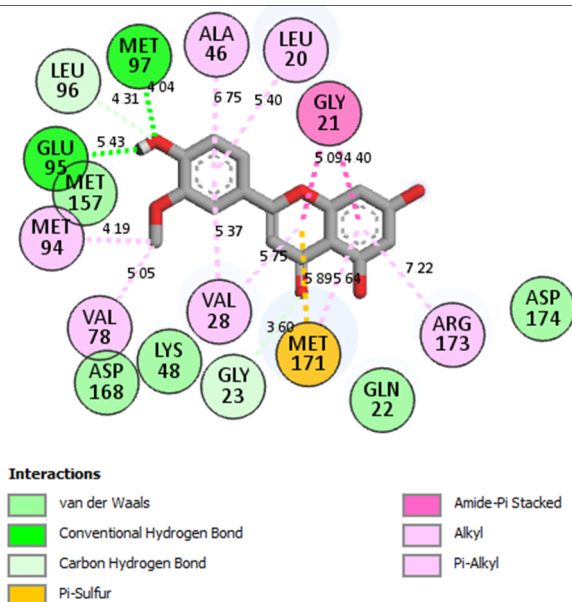

0 ns

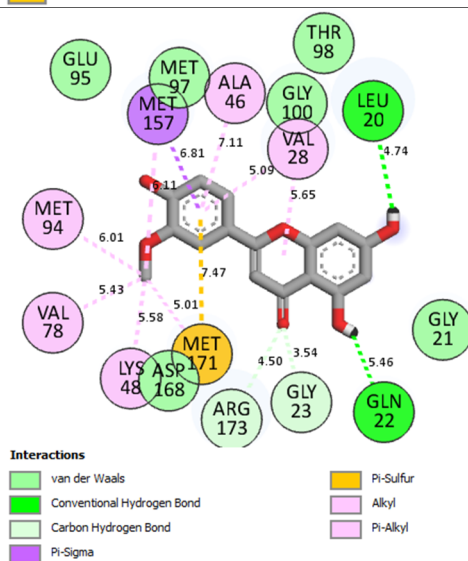

Isovitexin 60 ns

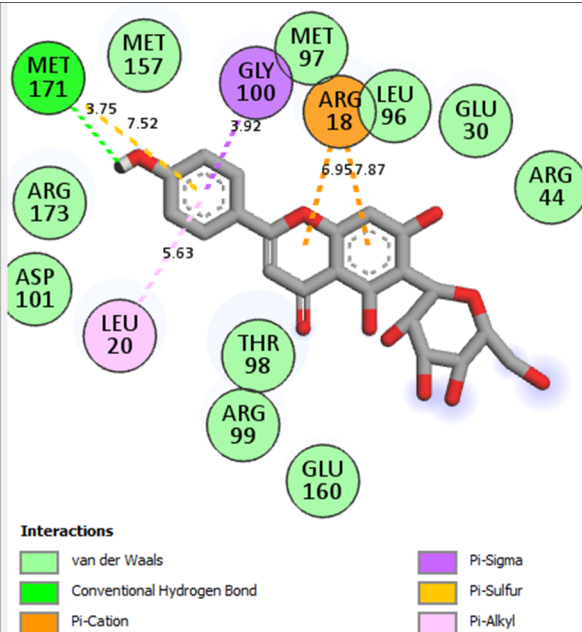

30 ns

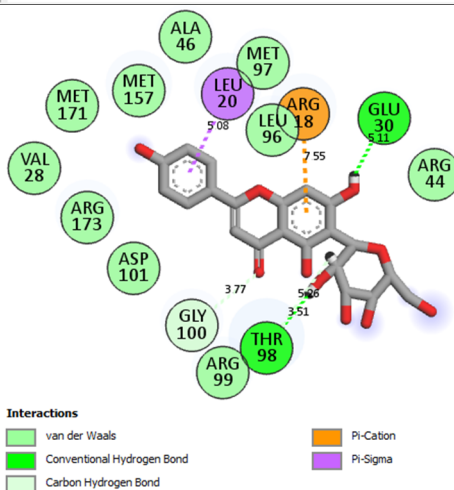

0 ns

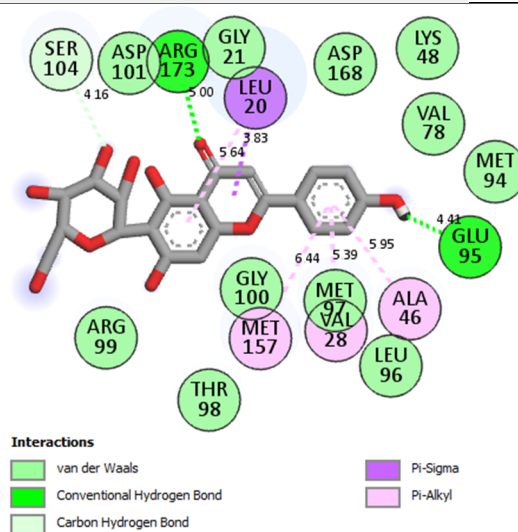



NVP-  
ADW742

60 ns

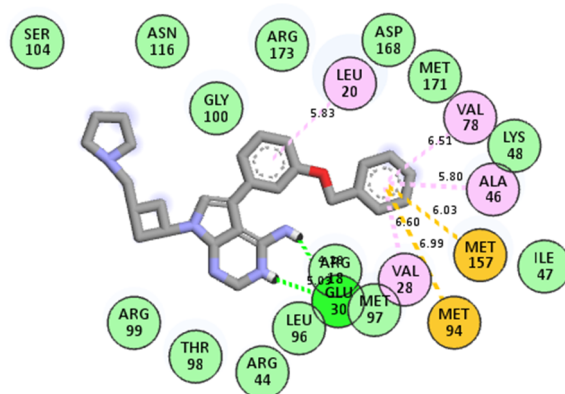

Interactions

- van der Waals
- Conventional Hydrogen Bond
- Pi-Sulfur
- Pi-Alkyl

30 ns

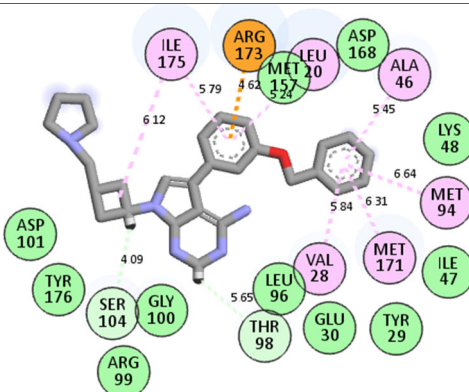

Interactions

- van der Waals
- Carbon Hydrogen Bond
- Pi-Cation
- Alkyl
- Pi-Alkyl

0 ns

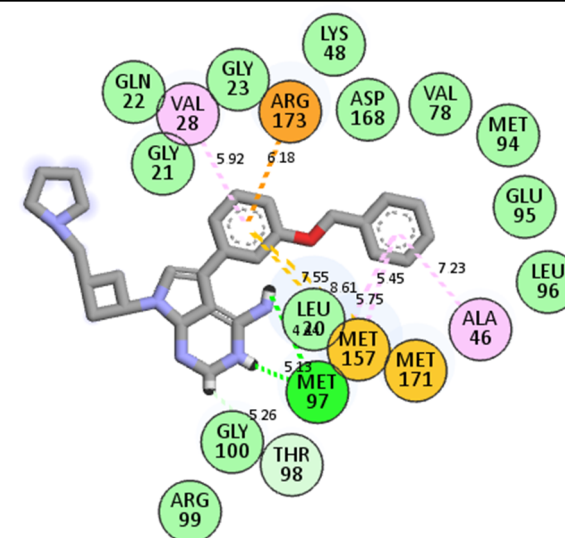

Interactions

- van der Waals
- Conventional Hydrogen Bond
- Carbon Hydrogen Bond
- Pi-Cation
- Pi-Sulfur
- Pi-Alkyl

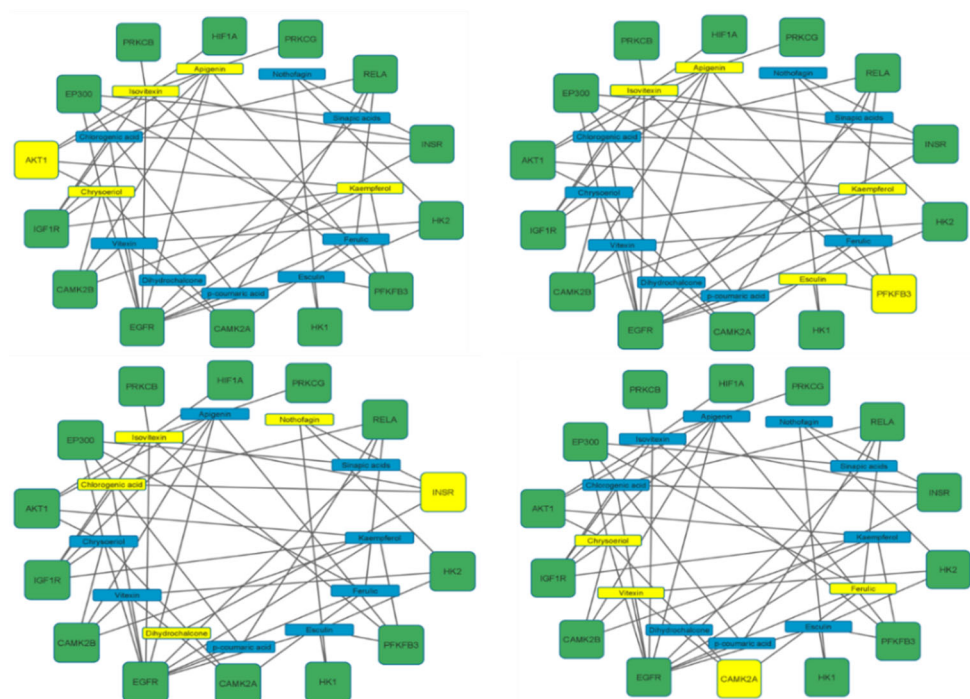

**Figure S1.** Rooibos compounds (4, 4, 4 and 3, respectively) with good interactions linked to other genes (AKT1, PFKFB3, INSR and CAMPK2A) related to the HIF-1 signaling pathway.
